# Supplementary material
Source: PubMed Central journal article supplement (PMC6282214)
Supplement: Supplemental_material.pdf [file Supplemental_material.pdf]

# Sup. FIGURE 1

## A.

### SHAM

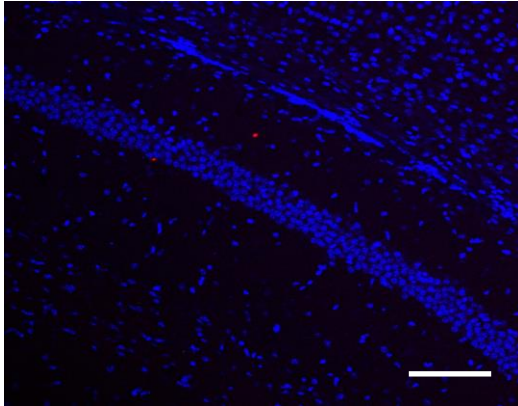

### CA/CPR

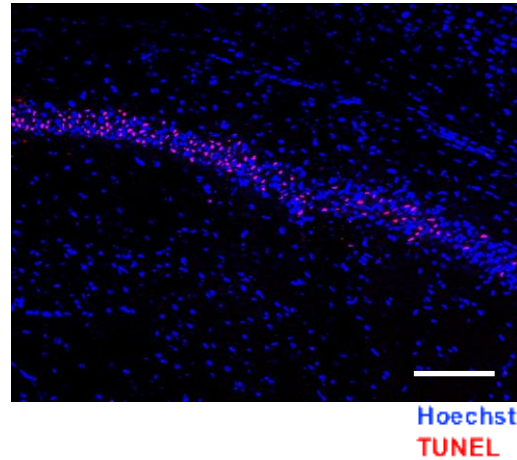

## B.

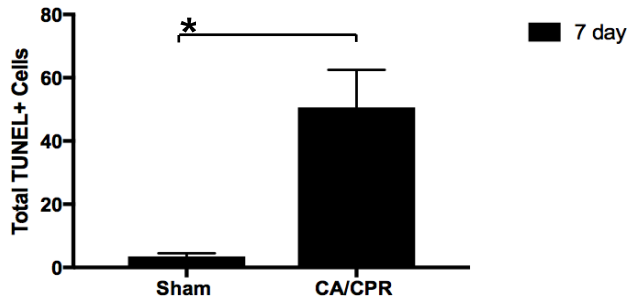

**Supplemental Figure 1.** TUNEL expression is increased after cardiac arrest. A. Representative images of CA1

region co-labeled with TUNEL (red) and Hoechst (blue) from 7 day Sham and 7 day CA/CPR. B. Quantification of

TUNEL+ cells per field of view in CA1 region of hippocampus, showing increased cell death following cardiac

arrest. Data represent mean  $\pm$  SEM, \* $p < 0.05$ , scale bar= 100  $\mu$ m.
